# Supplementary material for: Bean pod-like Si@dopamine-derived amorphous carbon@N-doped graphene nanosheet scrolls for high performance lithium storage
Source: Royal Society of Chemistry journal article supplement (doi:10.1039/c6ta04386k), 2016-01-01
Supplement: c6ta04386k1.pdf [file c6ta04386k1.pdf]

## Supporting information

### Bean pod-like Si@dopamine-derived amorphous carbon@N-doped graphene nanosheet scrolls for high performance lithium storage

Wei Sun,<sup>a,b</sup> Liu Wan,<sup>a</sup> Xiaocheng Li,<sup>a\*</sup> Xinhong Zhao,<sup>b\*</sup> Xingbin Yan<sup>a</sup>

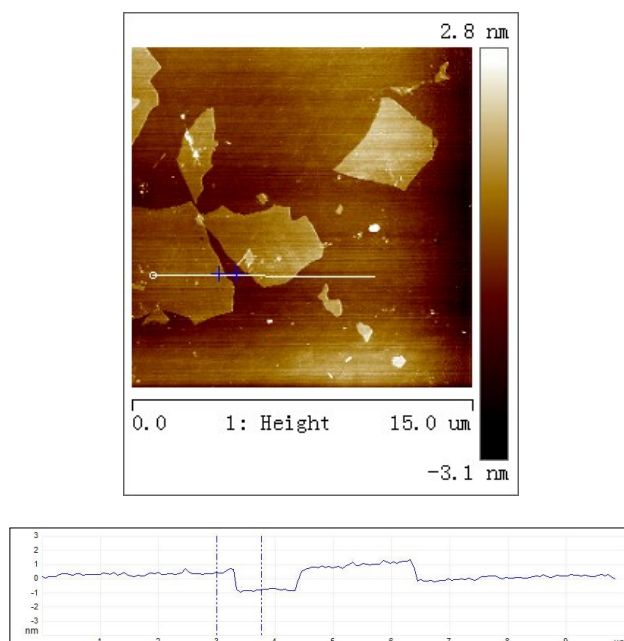

Fig. S1 AFM image of as-prepared GO nanosheets and corresponding cross-sectional profile. The GO nanosheets have a size of 4-6  $\mu\text{m}$  and thickness of 1.2 nm.

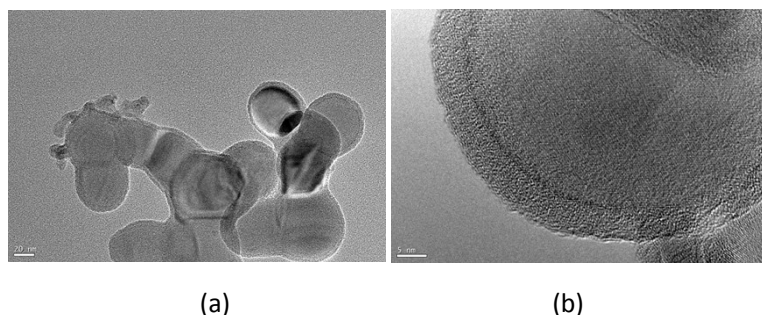

Figure S2 (a) Low magnification and (b) high magnification HRTEM image of dopamine molecules decorated on surface of SiNPs after annealing at 800 °C. It can be observed that the adsorbed dopamine molecules are converted to a thin layer of amorphous carbon with a thickness of  $\sim 5$  nm after thermal annealing. The dopamine derived amorphous carbon is denoted as DDAC.

\* \*Corresponding author. Tel./fax: +86-931-4968040; Email: xiaocheng@licp.cas.cn

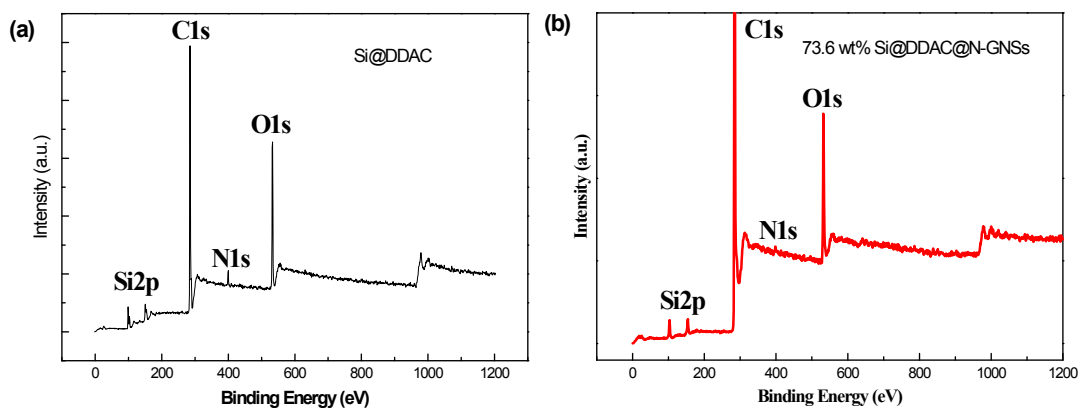

Fig. S3 Survey XPS spectra of (a) Si@DDAC and (b) GNS (73.6 wt% of Si, Sample B).

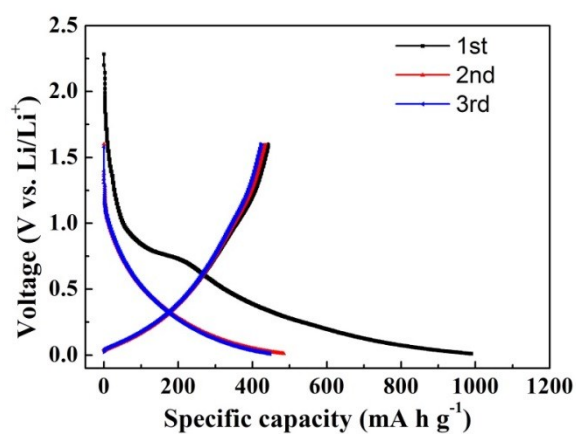

Fig. S4 Initial discharge/charge curves of rGO electrode at a current density of 0.3 A g<sup>-1</sup>.

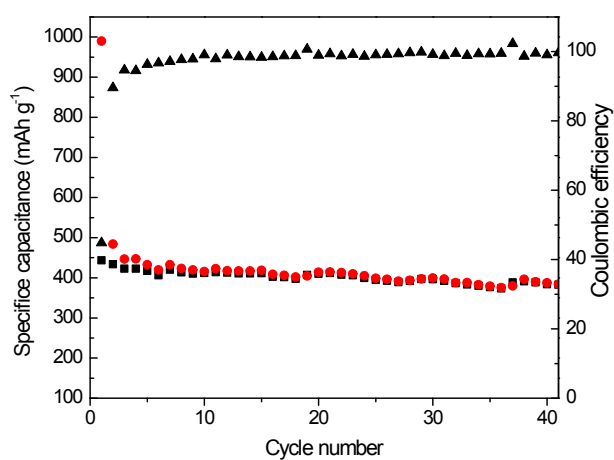

Fig. S5 Cycling stability of rGO at current density of 0.3 A g<sup>-1</sup>.

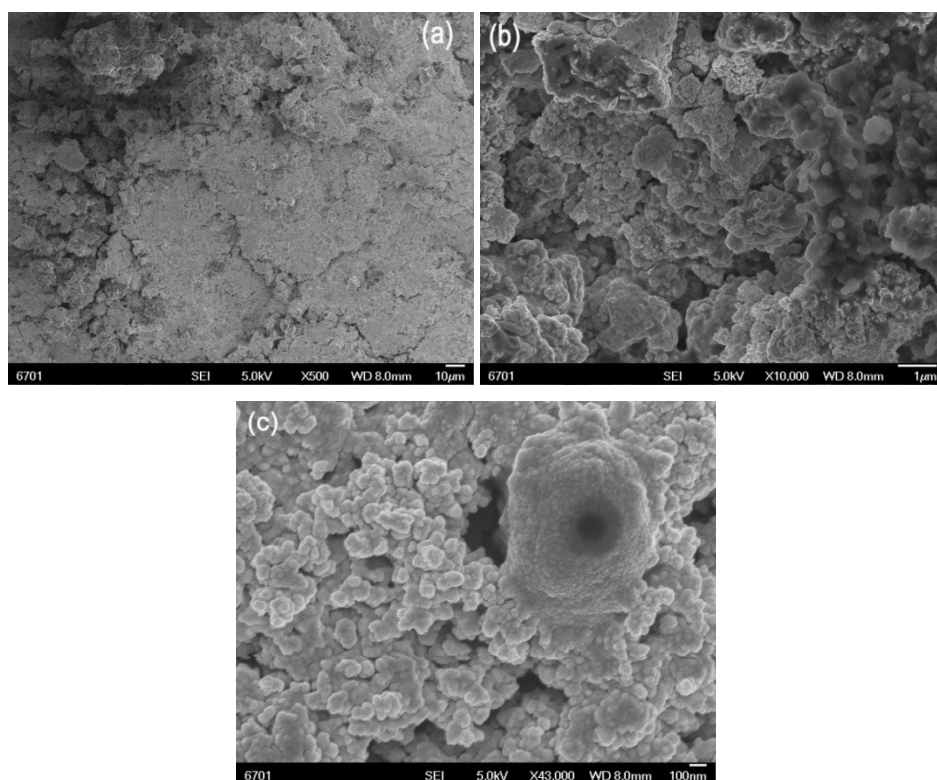

Fig. S6 (a) low-magnification and (b, c) high-magnification FESEM image of pristine Si-based electrode on Cu foil after cycling 110 cycles at  $2 \text{ A g}^{-1}$ .

Table S1 Lithium storage performance comparison of Si@DDAC@N-GNS and Si-based anodes in previous reports.

| Electrode structure            | Preparation method                            | charge capacity (1 <sup>st</sup> )  | CE (1 <sup>st</sup> ) | Rate capability                       | Cycling stability                             | Ref.     |
|--------------------------------|-----------------------------------------------|-------------------------------------|-----------------------|---------------------------------------|-----------------------------------------------|----------|
| Lily-like GS wrapped SiNPs     | Spray-drying                                  | 1525 mAh/g at 0.1A/g                | 70%                   | 1300 mAh/g at 0.6 A/g                 | 98.4% after 30 cycles (0.2 A/g) C             | 23       |
| Crumpled G-Encapsulated Si NPs | Ultrasonification-assisted furnace drying     | 1200 mAh/g at 0.2 A/g               | 73%                   | >600 mAh/g at 4 A/g                   | 83% after 250 cycles at 1A/g                  | 22       |
| 3D G-wrapped porous Si sphere  | LBL & magnesiothermic reduction               | >2750 mAh/g at 0.21A/g <sup>E</sup> | N.A.                  | 697.8 mA h g <sup>-1</sup> at 2.1 A/g | 1299 mAh/g after 25 cycles at 0.21 A/g        | 34       |
| Multilayered Si NPs/rGO        | Alternating dip-coating                       | 2300 mAh/g at 0.12A/g               | 73.0%                 | 700 mAh/g at 24 A/g                   | 765 mAh g <sup>-1</sup> (7.2A/g), no fading   | 58       |
| mSi@GNG                        | Freeze-drying & hydrazine reduction           | 1551 mAh/g at 0.1 A/g               | 85.6%                 | 548 mAh/g at 0.5 A/g                  | 93.1% after 80 cycles at 0.5 A/g <sup>C</sup> | 59       |
| CNFs/SiNPs@rGO                 | Electrospinning & electrostatic self-assembly | 1519 mAh/g at 0.89A/g               | 38%                   | N.A.                                  | 69% after 200 cycles at 0.89A/g <sup>C</sup>  | 60       |
| NG/Si@NC                       | Freeze-drying&carbonization                   | 1138 mAh/g at 0.5 A/g <sup>C</sup>  | 76%                   | 975 mAh/g at 2 A/g                    | 82% after 100 cycles at 0.5 A/g               | 41       |
| Si@DDAC@N-GNSs                 | Freeze-drying&carbonization                   | 2243 mAh/g at 0.3 A/g               | 74.9%                 | 947.8 mAh/g at 3 A/g                  | 91.5% after 110 cycles at 2 A/g               | Our work |

■ C Calculated from the published data. ■ E Estimated from published graph. G, rGO, CNF, SiNPs, mSi and GNG represent for graphene, reduced graphene oxide, carbon nanofiber, silicon nanoparticles, micro-sized silicon and giant nitrogen-doped graphene, respectively. CE stands for Coulombic efficiency. LBL represents for layer-by-layer assembly.
